# Supplementary material for: A molecular mechanism underlying gustatory memory trace for an association in the insular cortex
Source: eLife journal article supplement (doi:10.7554/elife.07582), 2015-10-09
Supplement: supp [file elife-07582-supp-v1.zip]

**A****pT286CaMKII $\alpha$** **pT305CaMKII $\alpha$** **CaMKII $\alpha$**  **$\beta$ -Tubulin**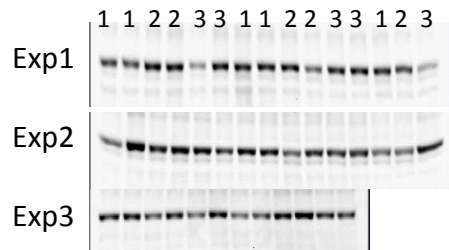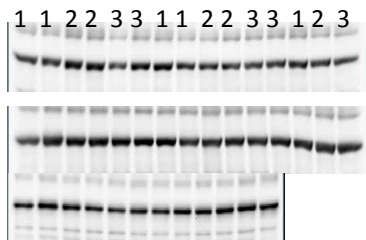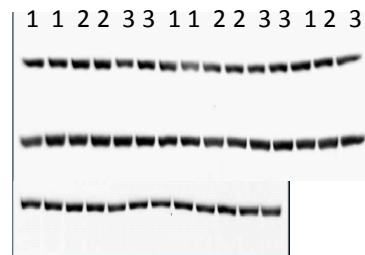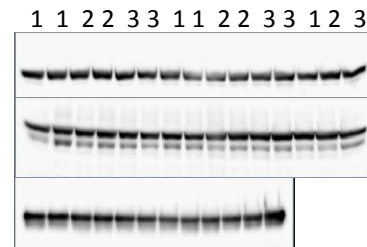

1 = Water + Saline, 2 = Novel taste + Saline, 3 = Novel taste + MK801
