# Supplementary material for: A molecular mechanism underlying gustatory memory trace for an association in the insular cortex
Source: eLife journal article supplement (doi:10.7554/elife.07582), 2015-10-09
Supplement: supp [file elife_poa_e07582_Figure_3_source_data_1.docx]

**Figure 3- source data 1**

**Figure 3B.** Independent samples t-test: n = Tatcont,11 and TatCN21, 11; T (20) = 2.302, P = 0.032.

**Figure 3C.** Independent samples t-test: n = Tatcont, 14; TatCN21, 15; T (27) = 2.061, P = 0.049.

**Figure 3D.** Independent samples t-test: n = Tatcont, 24 and TatCN21, 25; T (47) = 0.251, P = 0.803.

**Figure 3E.** Independent samples t-test: n = Tatcont, 11; TatCN21, 14; T (23) = 1.248, P = 0.225.
