# Supplementary material for: A molecular mechanism underlying gustatory memory trace for an association in the insular cortex
Source: eLife journal article supplement (doi:10.7554/elife.07582), 2015-10-09
Supplement: supp [file elife_poa_e07582_Figure_4_source_data_1.docx]

**Figure 4- source data 1**

**Figure 4A.** GluA1/β-Tubulin; n = water, 37 and novel taste, 38; T (61.256) = -3.982, P = 0.0001. pS831GluA1/GluA1; T (73) = -0.117, P = 0.907.

**Figure 4B.** Pearson correlation: water, R = 0.120, P = 0.478 and novel taste, R = 0.370, P = 0.020.

**Figure 4C.** n = Water+ Tatcont, 9, Novel taste+ Tatcont, 10, Novel taste+ TatCN21 10; between Tatcont injected water and novel taste; T (12.117) = -2.773, P = 0.014. between Tatcont+water and TatCN21+novel taste T (17) = -0.806, P = 0.431.

**Figure 4D.** n = saline, 11 and CNQX, 14; T (14.363) = 3.275, P = 0.005.

**Figure 4E.** n= saline, 10 and CNQX, 12; T (14.55) = 2.09, P = 0.041.

**Figure 4F.** n = saline, 9 and CNQX, 9; T (16) = 2.227, P = 0.049.

**Figure 4G.** n = saline, 13 and CNQX, 13; T (24) = 0.136, P = 0.893.
