# Supplementary figures and images for: A molecular mechanism underlying gustatory memory trace for an association in the insular cortex
Source: eLife journal article supplement (doi:10.7554/elife.07582), 2015-10-09

**A**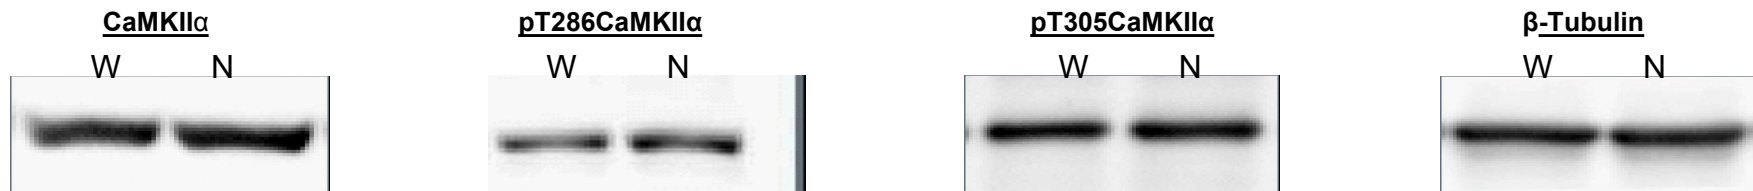**B**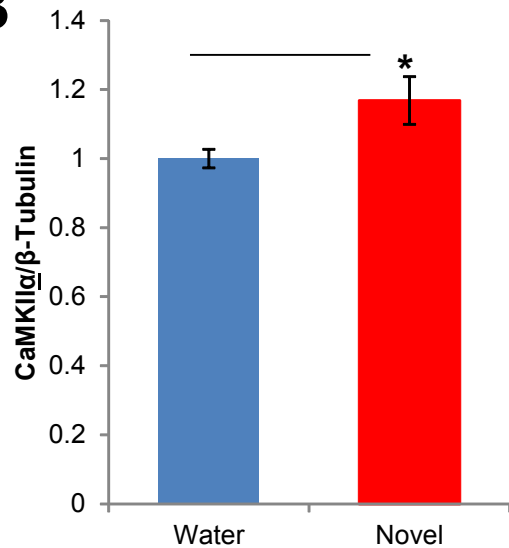**C**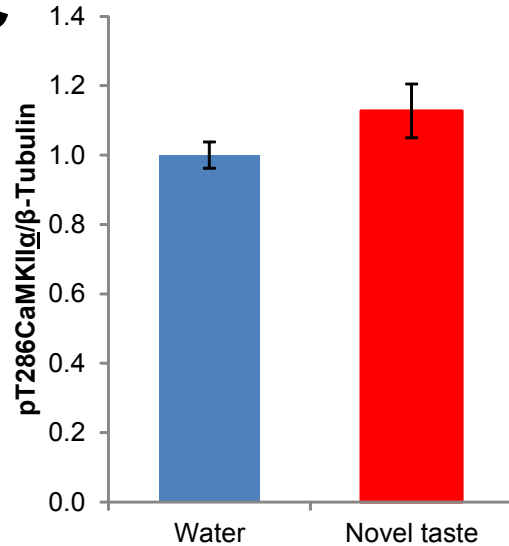**D**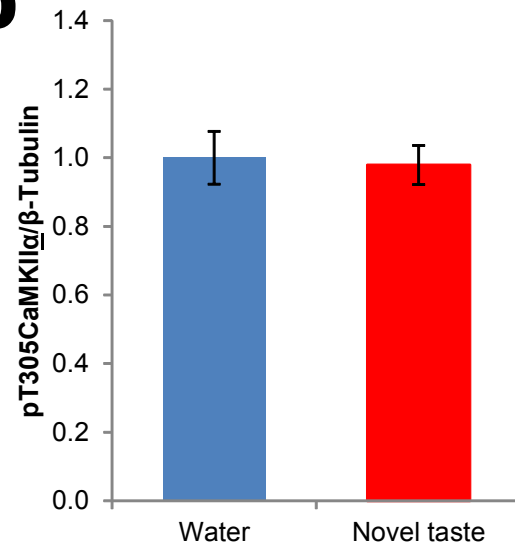

Supplement: supp [file elife-07582-supp-v1.zip]

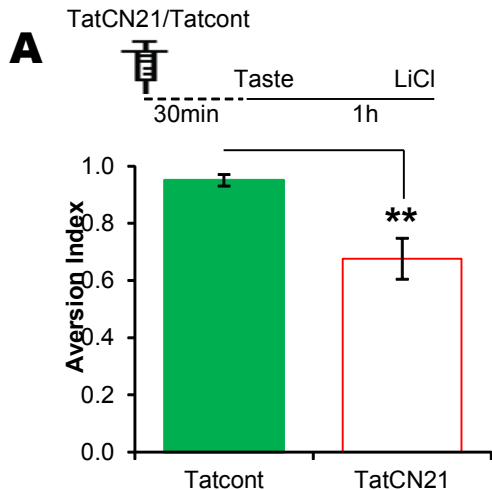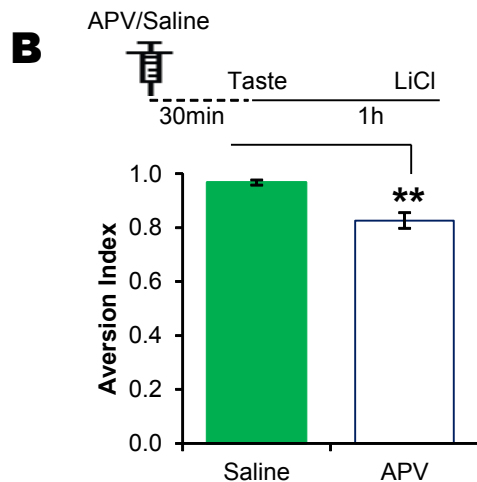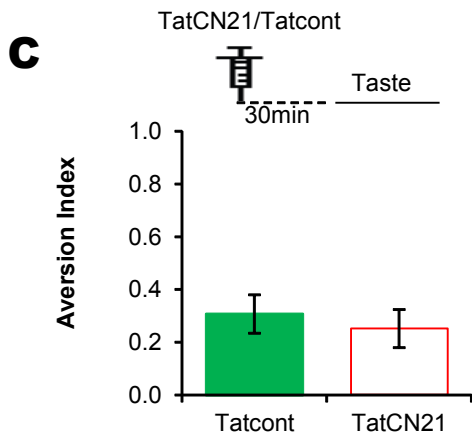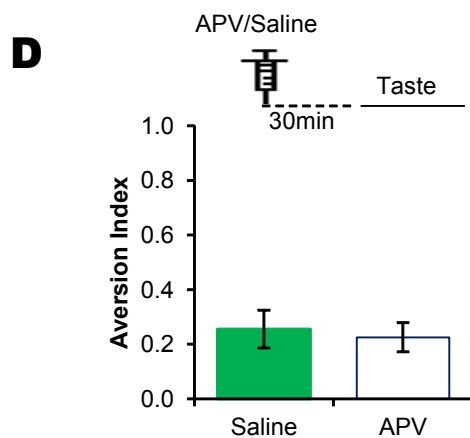

Supplement: supp [file elife-07582-supp-v1.zip]

**A****GluA1**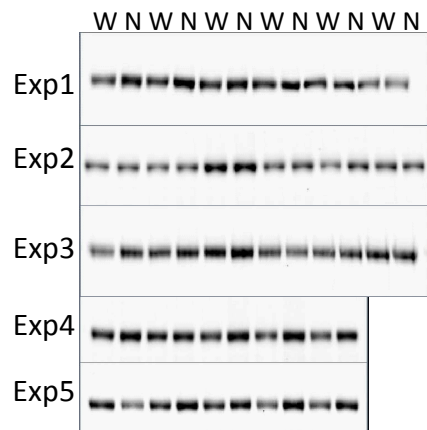**B****pS831-GluA1**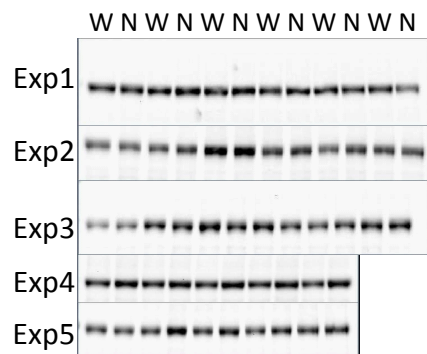**C****Exp1**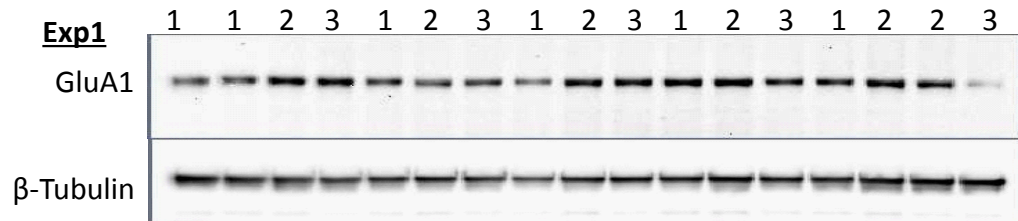**Exp2**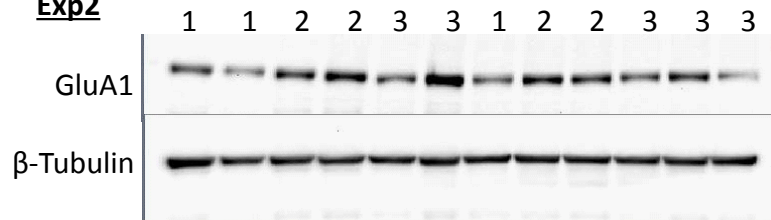

1 = Water + Tatcont

2 = Novel taste + Tatcont

3 = Novel taste + TatCN21

Supplement: supp [file elife-07582-supp-v1.zip]

# A

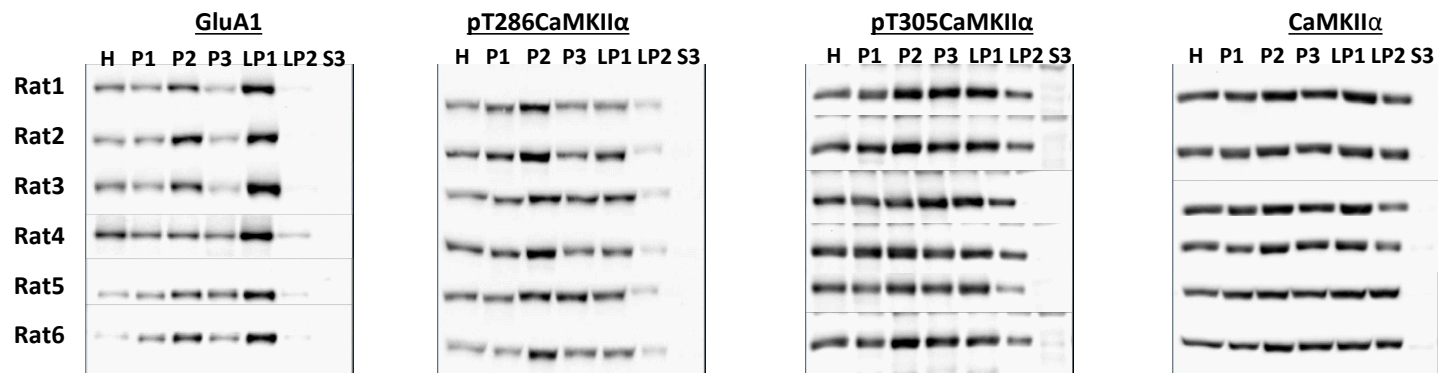

# B

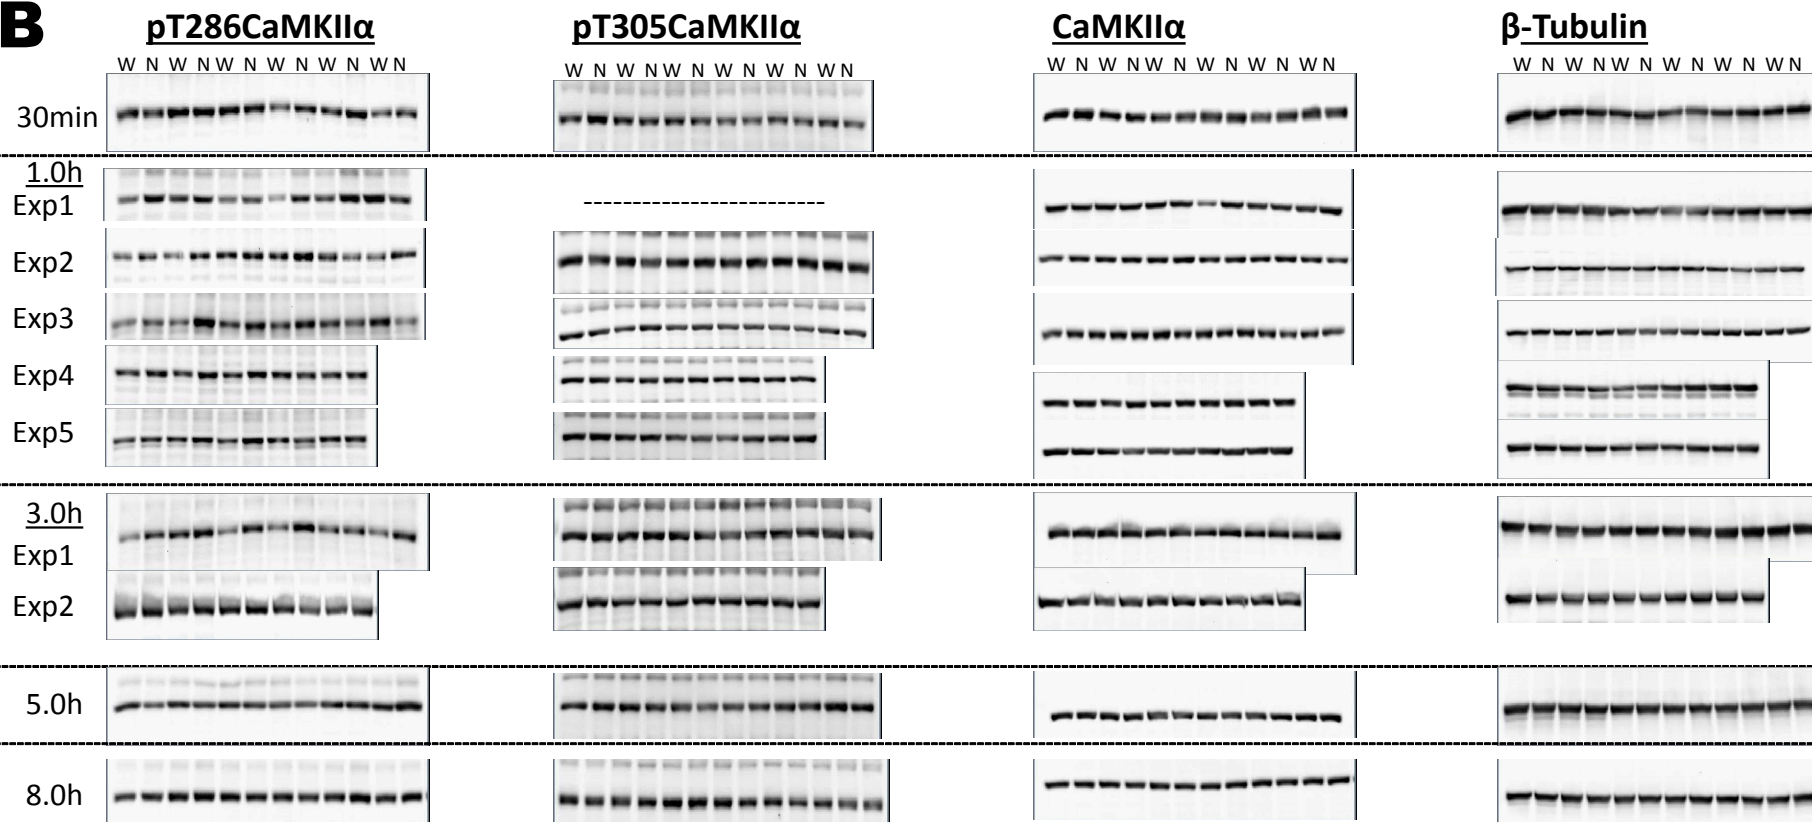

Supplement: supp [file elife-07582-supp-v1.zip]

CNQX/Saline

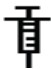

15min

Taste

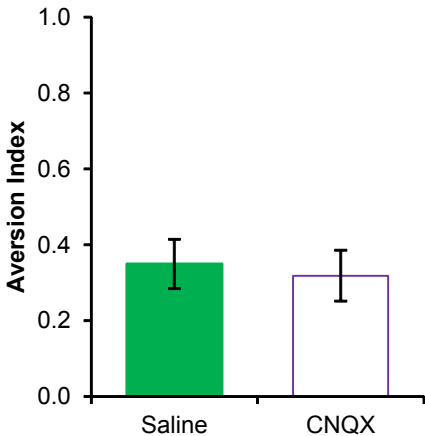

Supplement: supp [file elife-07582-supp-v1.zip]

**A**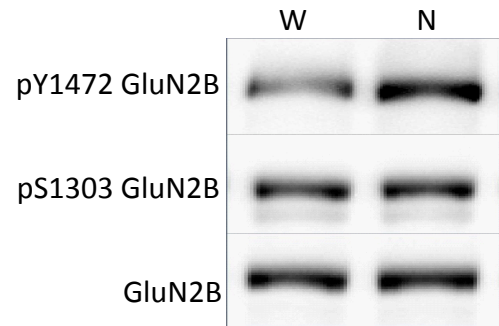**B**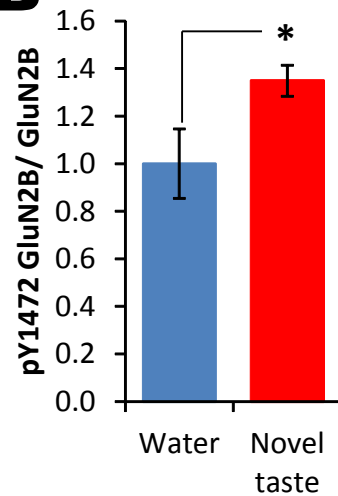**C**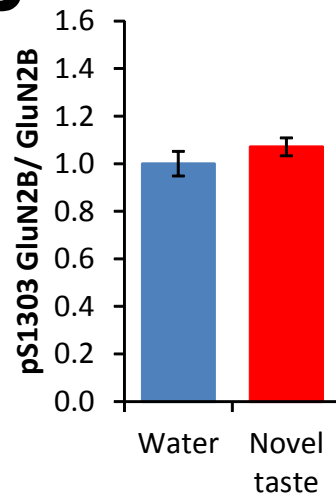**D**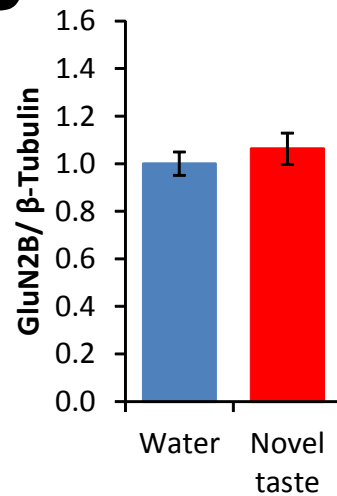

Supplement: supp [file elife-07582-supp-v1.zip]

**A**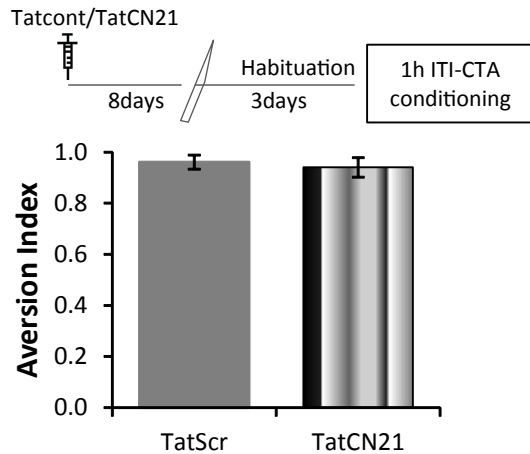**B**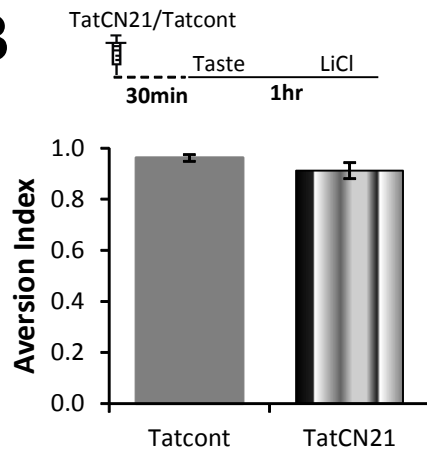**C**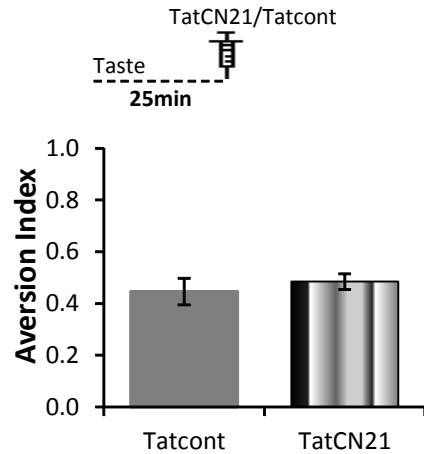

Supplement: supp [file elife-07582-supp-v1.zip]

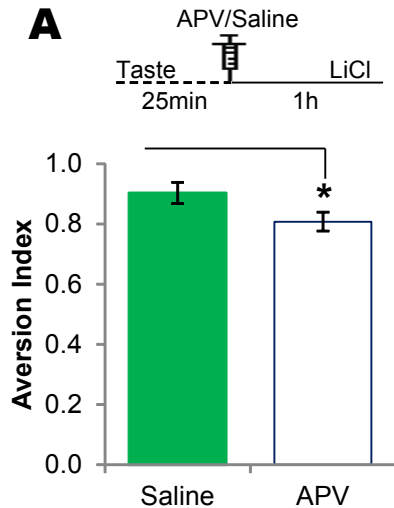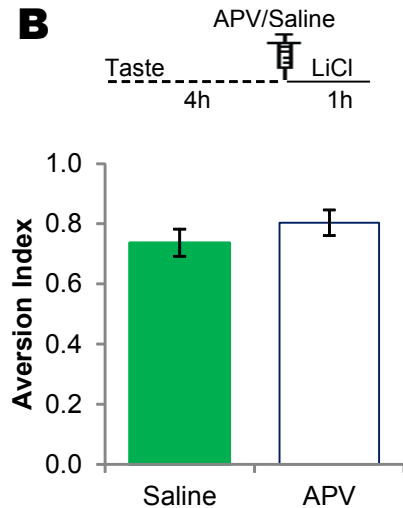

Supplement: supp [file elife-07582-supp-v1.zip]

**A**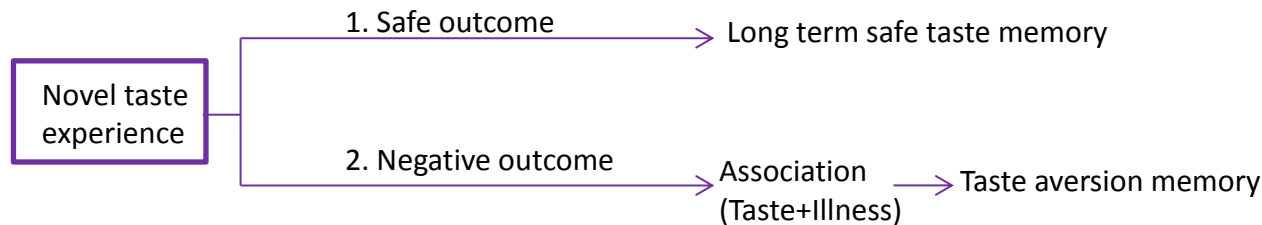**B**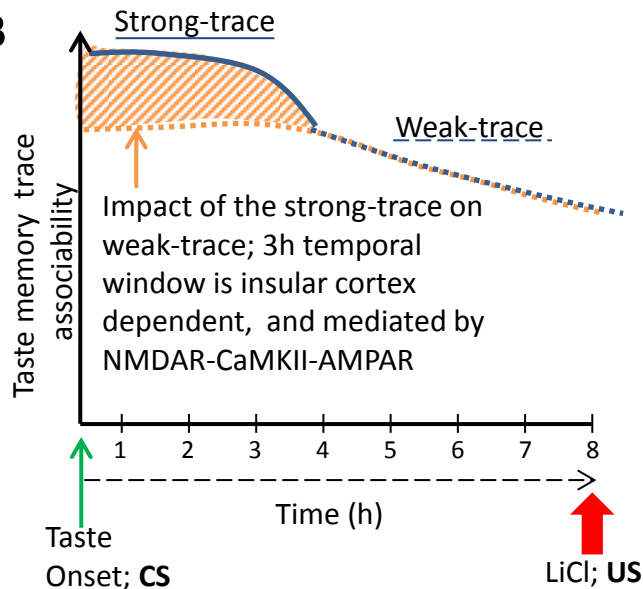**C**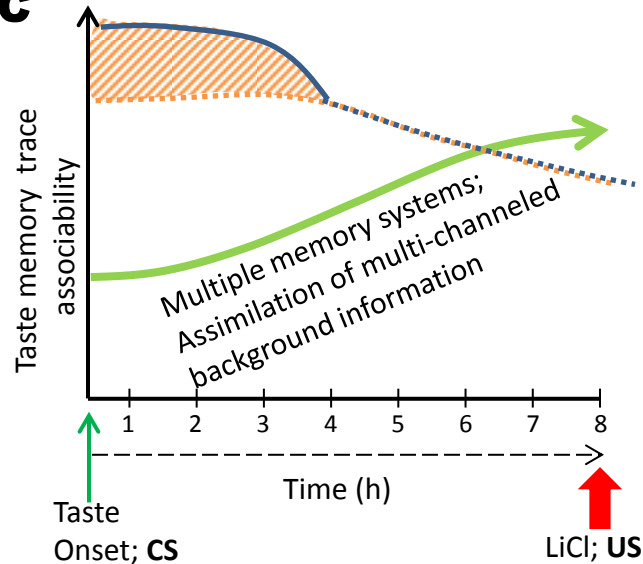

Supplement: supp [file elife-07582-supp-v1.zip]

**A**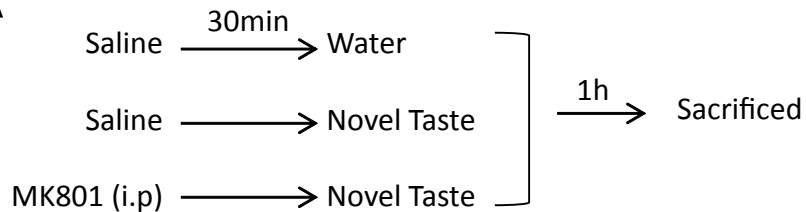**B**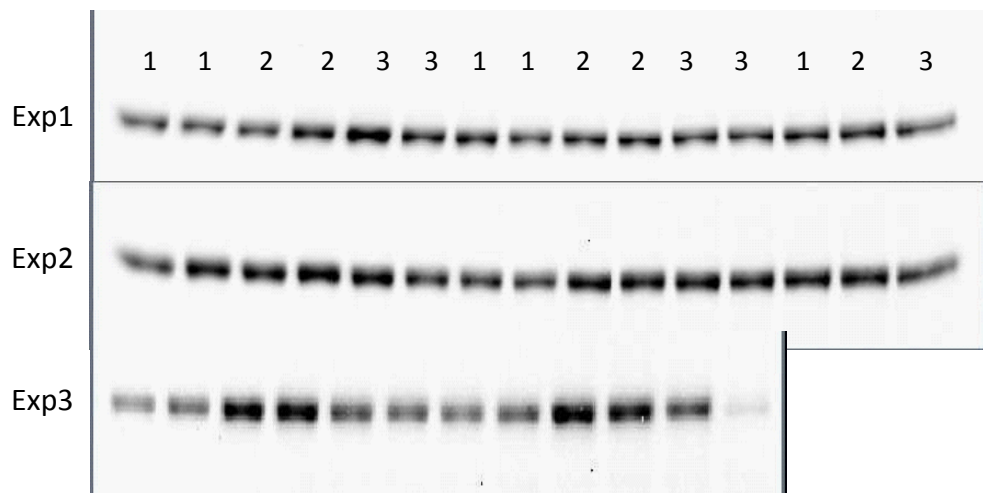

1 = Water + Saline, 2 = Novel taste + Saline, 3 = Novel taste + MK801

**C**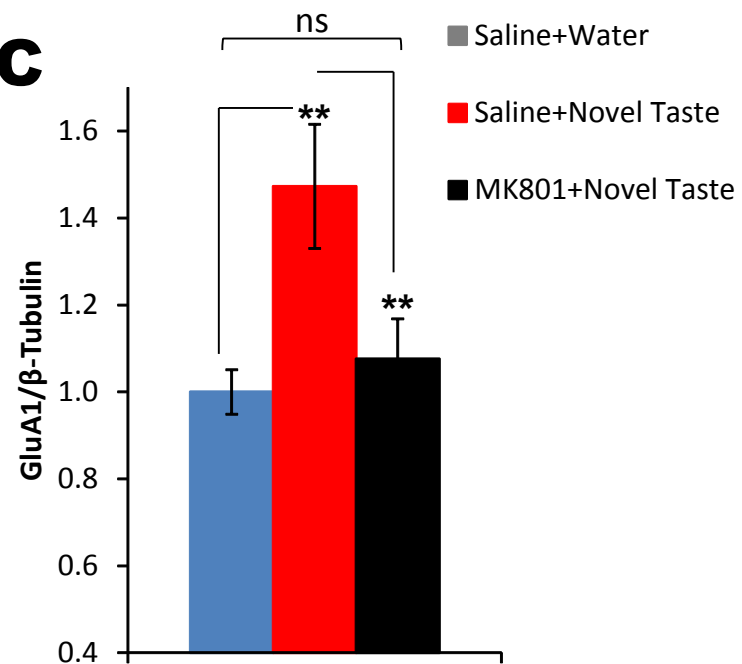

Supplement: supp [file elife-07582-supp-v1.zip]

**A**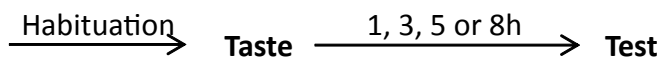**B**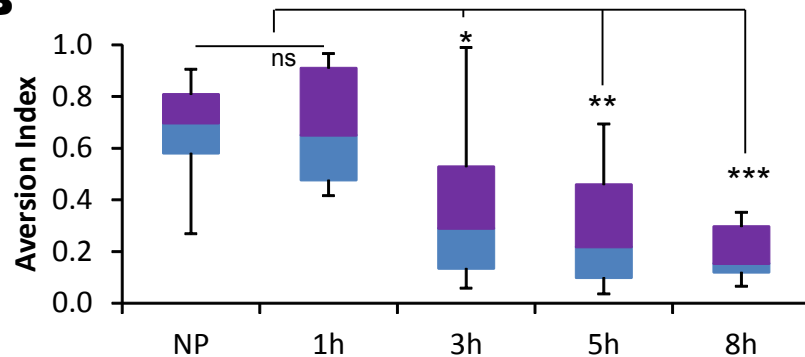**C**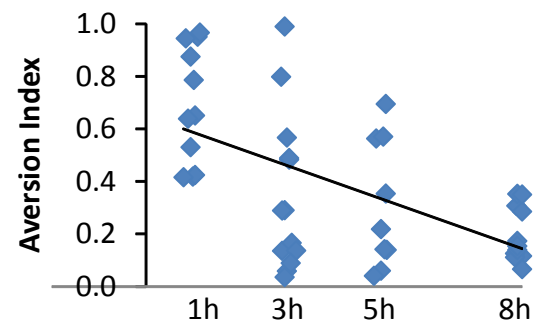**D**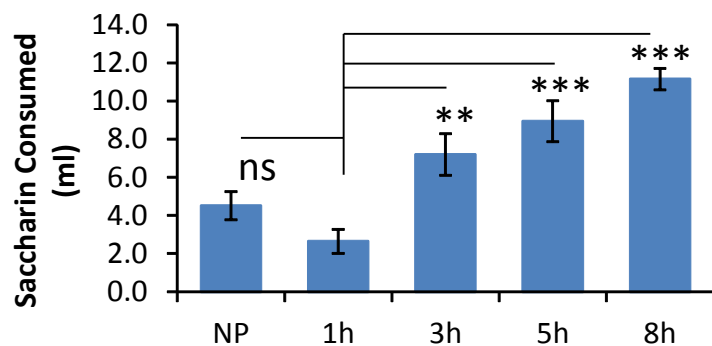**E**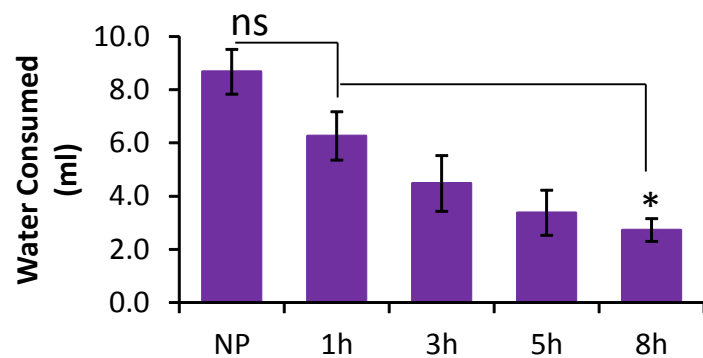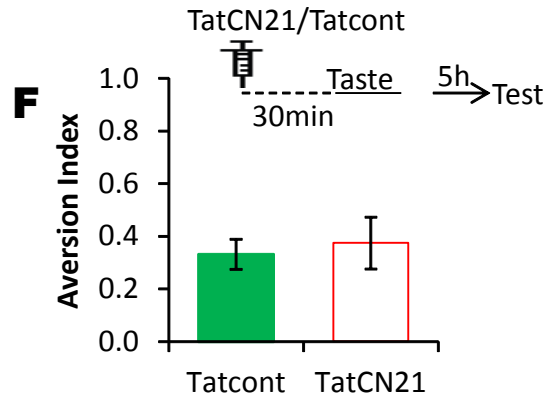

Supplement: supp [file elife-07582-supp-v1.zip]

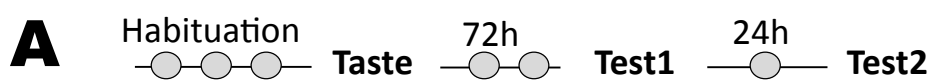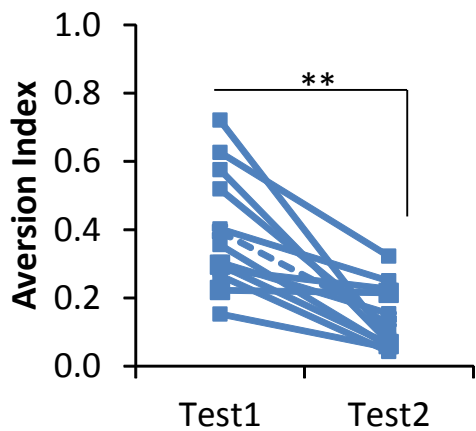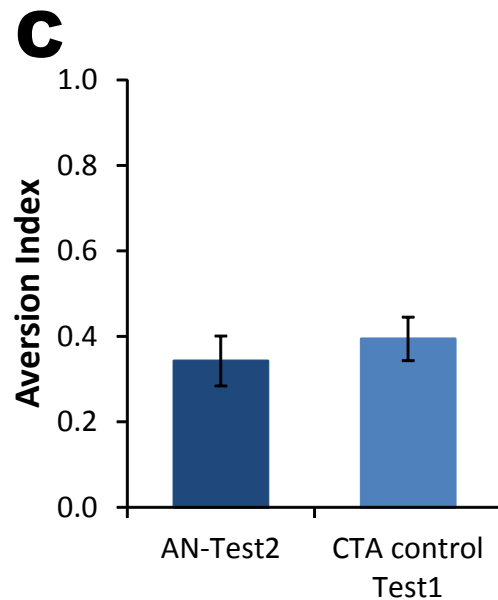

**B** Attenuation of Neophobia (AN)

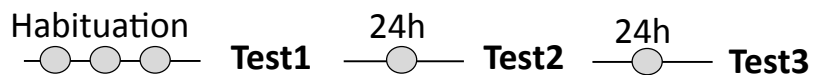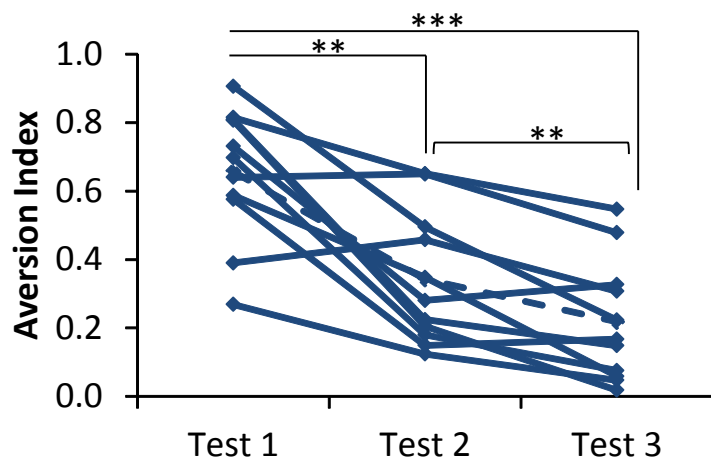

Supplement: supp [file elife-07582-supp-v1.zip]
